# Supplementary material
Source: Research Square preprint supplement (doi:10.21203/rs.3.rs-9192368/v1)
Supplement: Supplementary file 1 [file 4da29a54c118611065a8259b.pdf]

**Table S1. Primer sequences for genes associated with resistance, virulence, and the core components T6SS**

| Gene                              | Primer                                                   | Product size (bp) |
|-----------------------------------|----------------------------------------------------------|-------------------|
| <i>bla<sub>SHV</sub></i>          | F: TTATCTCCCTGTTAGCCACC<br>R: GATTTGCTGATTTGCTCGG        | 797               |
| <i>bla<sub>KPC-2</sub></i>        | F: GCAGCGGCAGCAGTTTGTGATT<br>R: GTAGACGGCCAACACAATAGGTGC | 184               |
| <i>bla<sub>GES</sub></i>          | F: TTGCAATGTGCTCAACGTTT<br>R: TATCACAACCAATATTGTCG       | 630               |
| <i>bla<sub>CTX-M</sub></i>        | F: ACGCTGTTGTTAGGAAGTG<br>R: TTGAGGCTGGGTGAAGT           | 759               |
| <i>bla<sub>TEM</sub></i>          | F: GAGTATTCAACATTTCCGTG<br>R: TAATCAGTGAGGCACCTATC       | 848               |
| <i>bla<sub>IMP</sub></i>          | F: TTGACACTCCATTTACTGCTA<br>R: TCATTTGTTAATTCAGATGCATA   | 172               |
| <i>bla<sub>VIM</sub></i>          | F: GAGTTGCTTTTGATTGATACAG<br>R: TCGATGAGAGTCCTTCTAGA     | 247               |
| <i>bla<sub>NDM-1</sub></i>        | F: GGAAACTGGCGACCAACG<br>R: ATGCGGGCCGTATGAGTGA          | 678               |
| <i>bla<sub>OXA-23-like</sub></i>  | F: GATCGGATTGGAGAACCAGA<br>R: ATTTCTGACCGCATTTCCAT       | 501               |
| <i>bla<sub>OXA-24/40</sub></i>    | F: GGTTAGTTGGCCCCCTTAAA<br>R: AGTTGAGCGAAAAGGGGATT       | 246               |
| <i>bla<sub>OXA-51-like</sub></i>  | F: TAATGCTTTGATCGGCCTTG<br>R: TGGATTGCACTTCATCTTGG       | 353               |
| <i>bla<sub>OXA-58</sub></i>       | F: AAGTATTGGGGCTTGTGCTG<br>R: CCCCTCTGCGCTCTACATAC       | 599               |
| <i>bla<sub>OXA-143-like</sub></i> | F: TGGCACTTTCAGCAGTTCCT<br>R: TAATCTTGAGGGGGCCAACC       | 149               |
| <i>adeB</i>                       | F: TTAACGATAGCGTTGTAACC<br>R: TGAGCAGACAATGGAATAGT       | 541               |
| <i>adeE</i>                       | F: GAGCTGAGGATTCTCTATGT<br>R: AGTGTGCTCACCATATAGTC       | 504               |
| <i>adeG</i>                       | F: CCGATCTTTGCTGGTGTGC<br>R: TTACCGTCGCTGTTTGCTT         | 236               |
| <i>adeJ</i>                       | F: ATTGCAACCACCAACCGTAAC<br>R: TAGCTGGATCAAGCCAGATA      | 453               |
| <i>adeR</i>                       | F: ACTACGATATTGGCGACATT<br>R: GCGTCAGATTAAGCAAGATT       | 447               |
| <i>adeS</i>                       | F: TTGGTTAGCCACTGTTATCT<br>R: AGTGGACGTTAGGTCAAGTT       | 544               |
| <i>abeM</i>                       | F: GTAGGTGTAGGCTTATGGA<br>R: GTACCGAAGTGACTGAAAT         | 303               |

|             |                                                                           |      |
|-------------|---------------------------------------------------------------------------|------|
| <i>carO</i> | F: ATGAAAGTATTACGTGTTTTAGTGACAAC<br>R: TTACCAGTAGAATTCNACACCAACT          | 53.6 |
| <i>ompA</i> | F: CAATTGTTATCTCTGGAG<br>R: ACCTTGAGTAGACAAACGA                           | 966  |
| <i>bap</i>  | F: CGTTTCCTGGGTCTGATGTATT<br>R: GTTATTGAAGGCTTCTTTAGTG                    | 942  |
| <i>bfmS</i> | F: ATATATGCGGGGCTGGTAATTC<br>R: ATGCAGGTGCTTTTTTATTGGT                    | 1650 |
| <i>cusE</i> | F: ATGCATGTTCTCTGGACTGATGTTGAC<br>R: CGACTTGTACCGTGACCGTATCTTGATAAG       | 976  |
| <i>abaI</i> | F: GTACAGTCGACGTATTTGTTGAATATTTGGG<br>R: CGTACGTCTAGAGTAATGAGTTGTTTTGCGCC | 382  |
| <i>hcp</i>  | F: TGCTGAGCGTGTGGAACATT<br>R: ACGTTTATCGCCATTTGCAC                        | 142  |
| <i>tssM</i> | F: GCAAAGACGTCTACAACAGTTAGAC<br>R: TTGCTGATCATCACGTTTACGAAC               | 1195 |

---
